# Supplementary material for: Interaction with the Assembly Chaperone Ump1 Promotes Incorporation of the β7 Subunit into Half-Proteasome Precursor Complexes Driving Their Dimerization
Source: MDPI journal article supplement (doi:10.3390/biom12020253), 2022-02-04
Supplement: s1 [file s1]

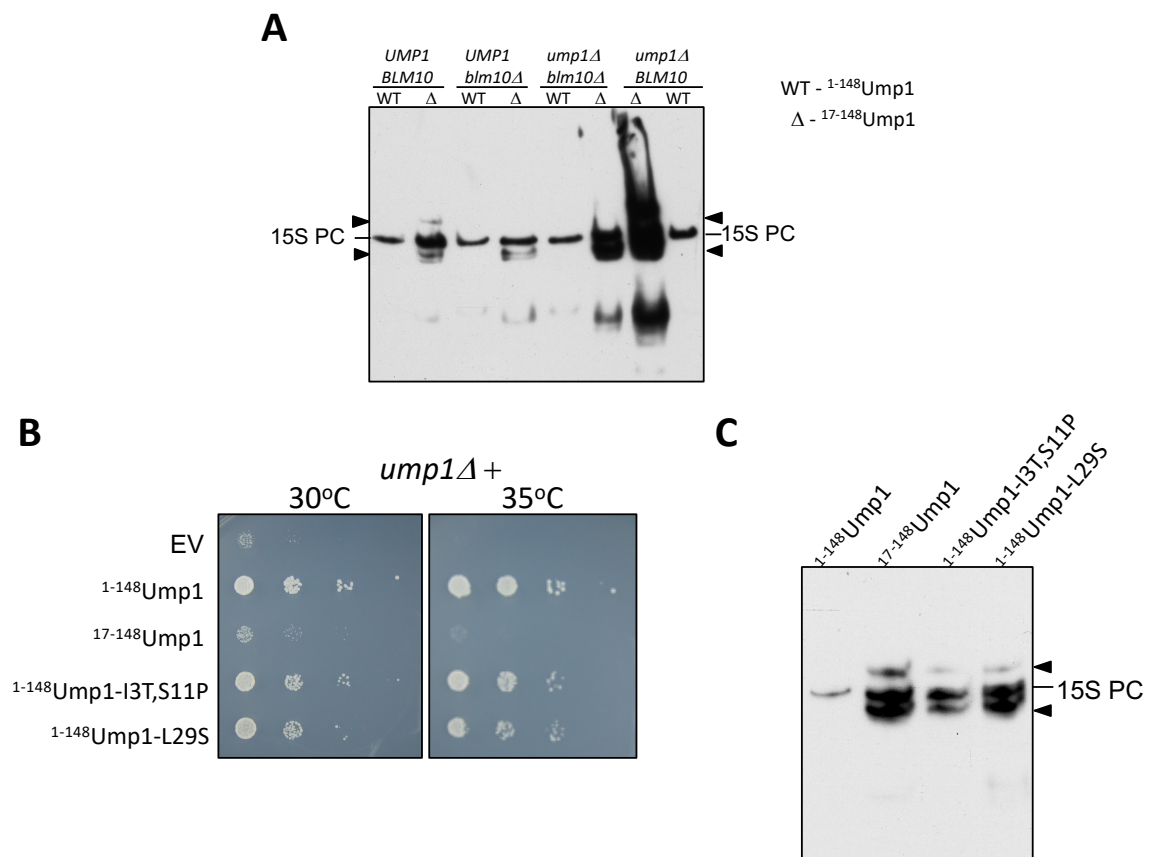

**Figure S1.** Characterization of complexes in cells with mutant Ump1. **(A)** Native extracts from the indicated strains expressing either Ump1-Ha (WT) or <sup>17-148</sup>Ump1-Ha (Δ) were analyzed by native PAGE and anti-HA western blotting. **(B)** Spot assays comparing the growth of *ump1Δ* cells expressing the indicated Ump1 versions. Cells were spotted in serial dilutions onto selective SD media and grown for 2 days at the indicated temperatures. **(C)** Analysis of Ump1-HA complexes in the same strains as in (B) by native PAGE and anti-HA western blotting.

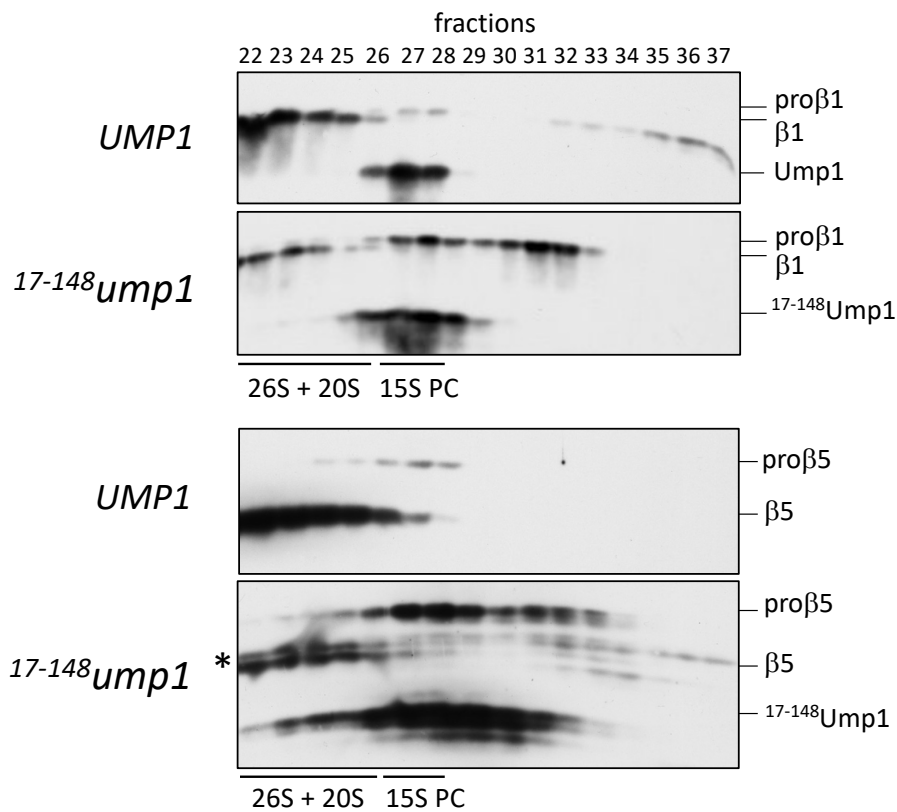

**Figure S2.** Processing of  $\beta 5$  is incomplete in absence of the first 16 ump1 residues. Crude extracts from cells expressing either  $\beta 1$ -HA (top two panels) or  $\beta 5$ -HA (bottom two panels) and Ump1-HA were fractionated by Superose 6 gel filtration and analyzed by SDS-PAGE and anti-HA western blotting. The upper panel displays results for the wild-type (*UMP1*), the bottom panel the results for cells with truncated Ump1 (*<sup>17-148</sup>ump1*). The positions of precursor and mature forms of  $\beta$  subunits and of Ump1 are indicated on the right. An asterisk points to an incompletely processed form of  $\beta 5$  observed in *<sup>17-148</sup>ump1* cells. Fractions that typically contain the 26S proteasome, the 20S CP, or the 15S PC are indicated at the bottom.

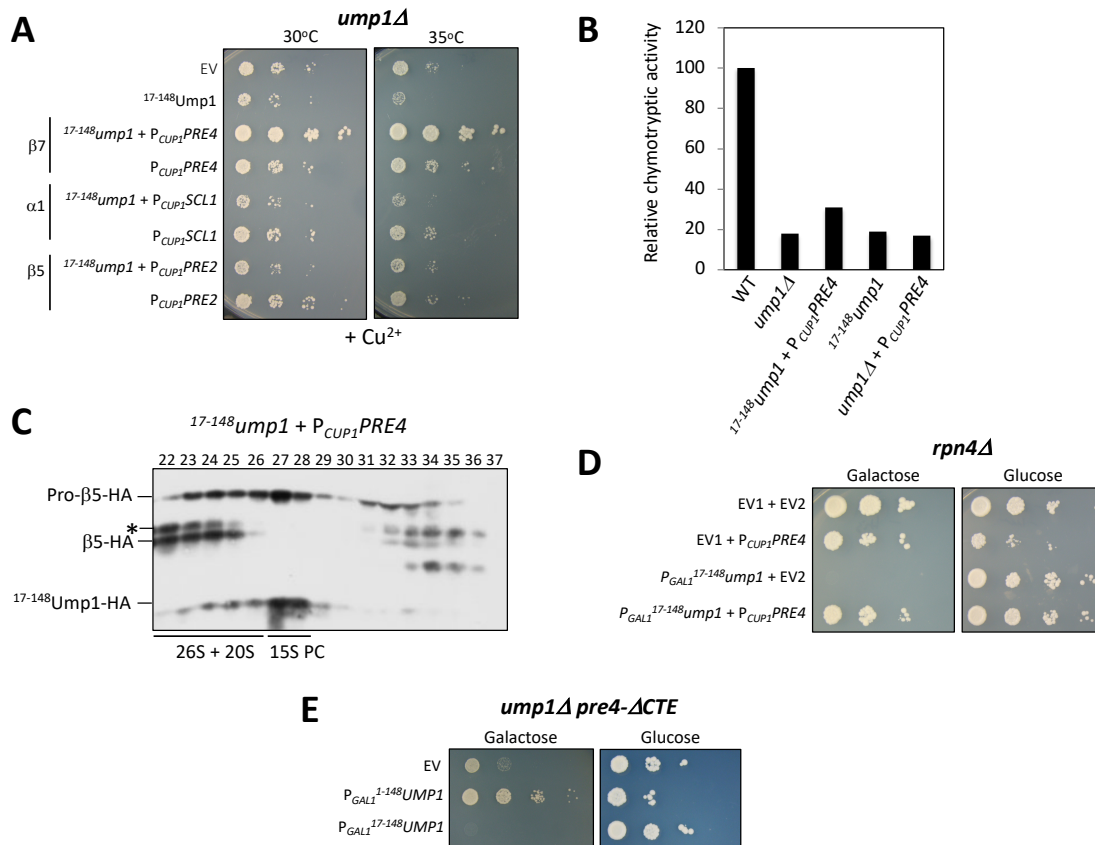

**Figure S3.** Overexpression of  $\beta 7$  suppresses defects caused by  $17-148Ump1$ . **(A)** Effect of overexpressing *PRE4*/ $\beta 7$ , *PRE2*/ $\beta 5$  and *SCL1*/ $\alpha 1$  together on growth of  $17-148ump1$  cells. EV, empty vector control. **(B)** Effect of  $\beta 7$  overexpression on chymotryptic activity in the indicated backgrounds. **(C)** Effect of  $\beta 7$  overexpression on  $\beta 5$  processing analysed by gel filtration. The positions of precursor and mature forms of  $\beta$  subunits and of  $17-148Ump1$  are indicated on the left. An asterisk points to an incompletely processed form of  $\beta 5$  observed in  $17-148ump1$  cells. **(D)** Overexpression of *PRE4*/ $\beta 7$  suppresses growth defects caused by induction of  $17-148ump1$  expression from  $P_{GAL1}$  in a *rpn4Δ* background. Cells were transformed with two plasmids, either empty vectors (EV1, EV2) and/or with plasmids expressing  $17-148ump1$  from  $P_{GAL1}$  or *PRE4*/ $\beta 7$  from  $P_{CUP1}$ . Serial dilutions of the transformed cells were spotted on SD media either with galactose or glucose as carbon sources and incubated at 30°C for 3 or 2 days, respectively. **(E)** Cells lacking the C-terminal extension of Pre4/ $\beta 7$  are hyper-sensitive to  $17-148ump1$  expression. Cells with the indicated genotype and plasmids were processed as in (D).

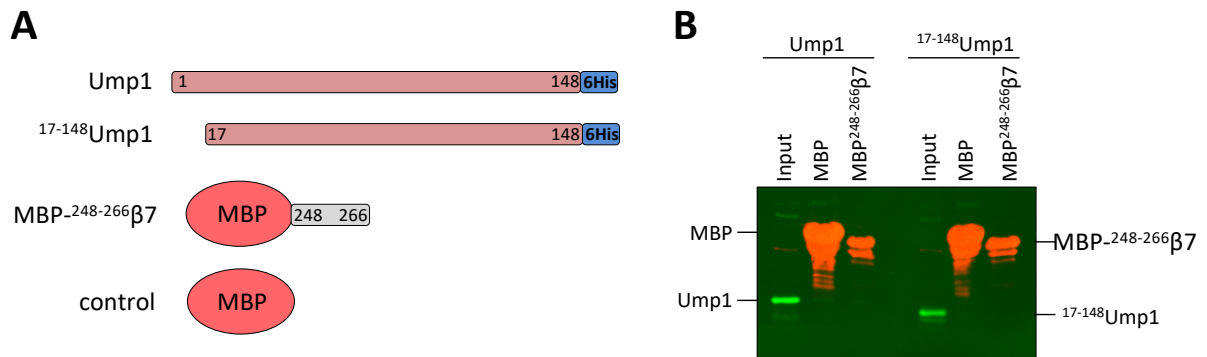

**Figure S4.** The C-terminal extension of Pre4/β7 by itself does not promote binding to Ump1. **(A)** Schematic representation of 6His tagged Ump1 versions and β7-Cterminus (β7-CT) fused to Maltose Binding Protein (MBP). MBP alone was used as control. **(B)** Western Blot analysis of interactions between Ump1 variants and the C-terminus of β7. Amylose resin was incubated with the native protein extract of 50 OD cells expressing MBP-β7-CT or MBP control. After 5x washing, binding was proceeded with the same amount of Ump1 variants <sup>1-148</sup>Ump1 or <sup>16-148</sup>Ump1. Samples were washed 3x and eluted in 40 μl sample buffer. 10 μl of the samples were loaded on a gel next to 1 % Input of the Ump1 variants and analyzed by Western Blot using anti-β7 and anti-Ump1 antibodies.



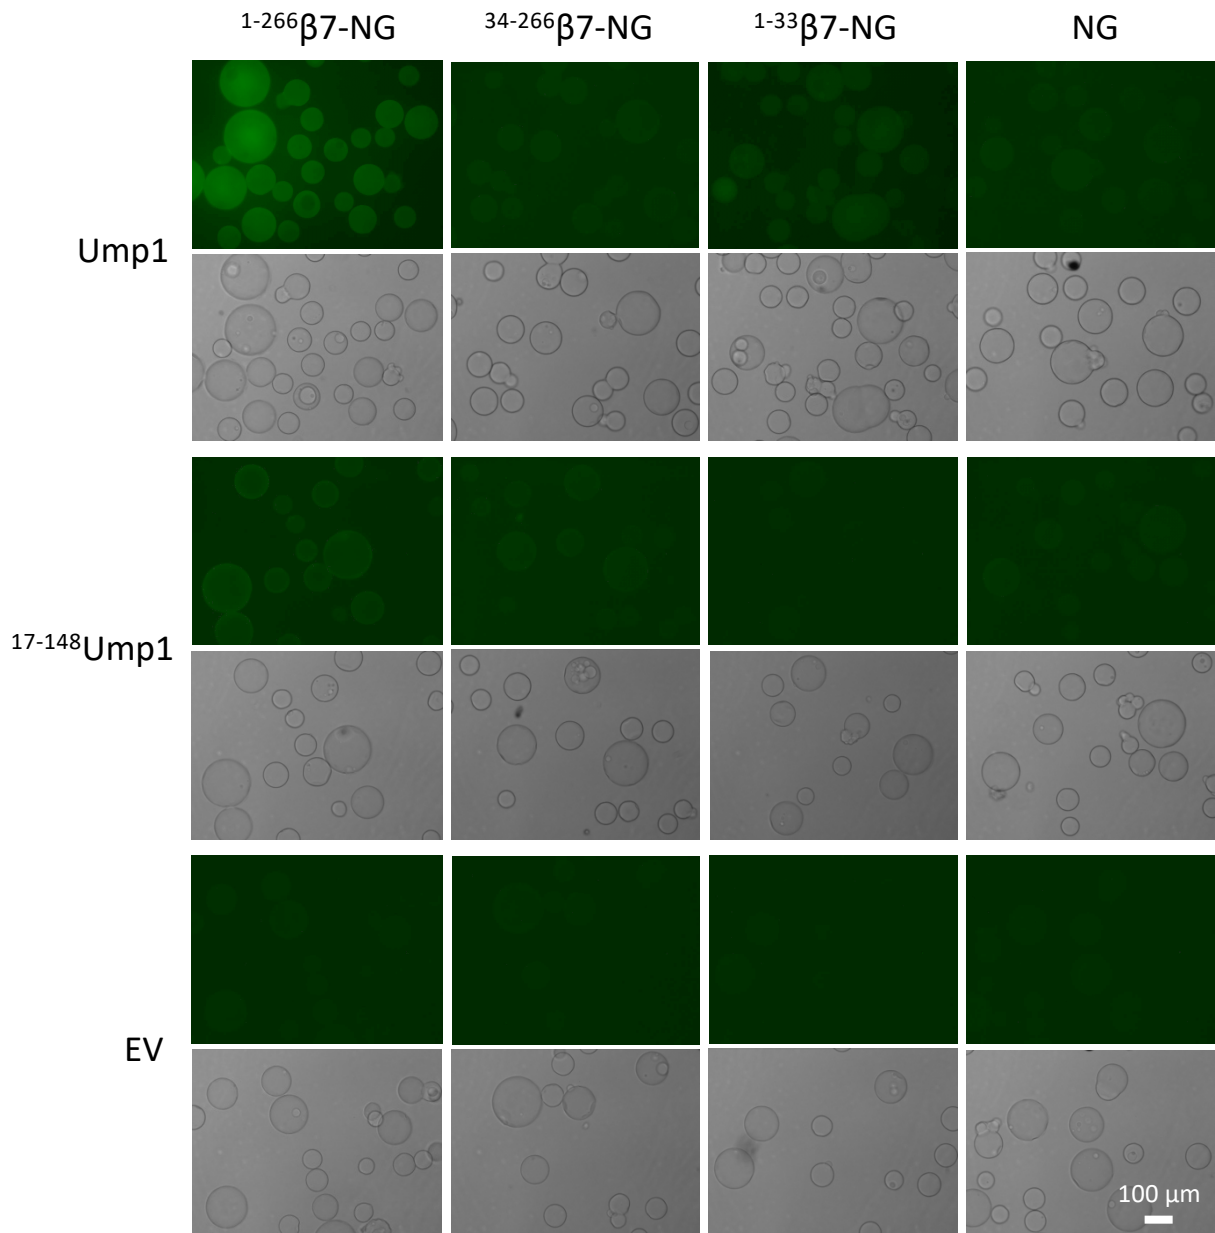

**Figure S5.** Complete set of pictures including empty vector controls and phase contrast image of beads of experiment shown in figure 5B. The top two rows of green fluorescence are the same as shown in Figure 5B. Shown here, in addition, are images of the empty vector (EV) control that were used as background for the quantitative analysis shown in Figure 5C, and phase contrast images relating to all fluorescence images shown.

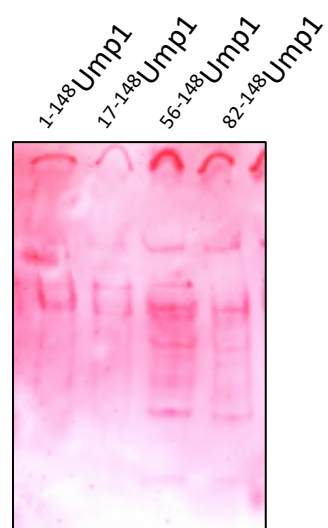

**Figure S6.** Ponceau S staining of the membrane shown in Figure 1C.

**Figure S7.** Gel filtration chromatograms (A280/mL) for western blot analyses.

**A.** Chromatogram for gel filtration shown in Figure 1D

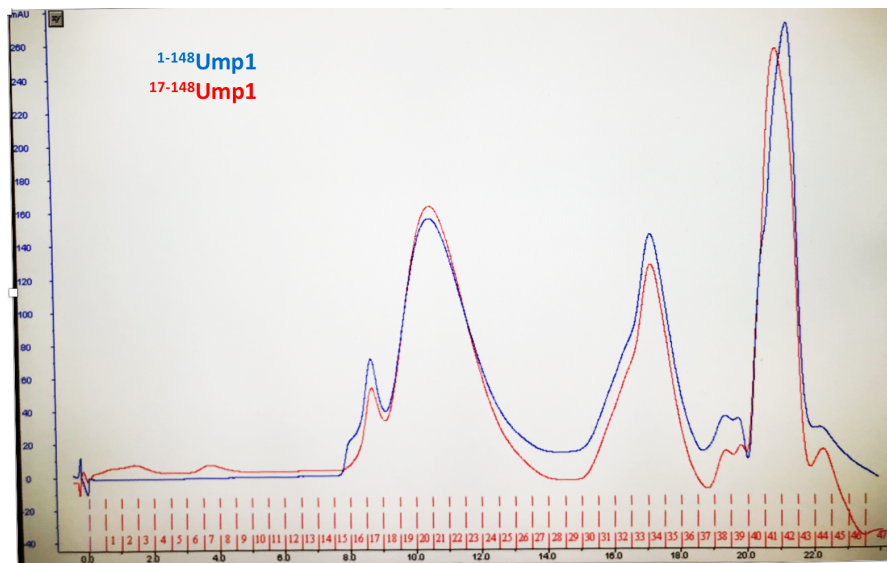

**B.** Chromatogram for gel filtration shown in Figure 2D

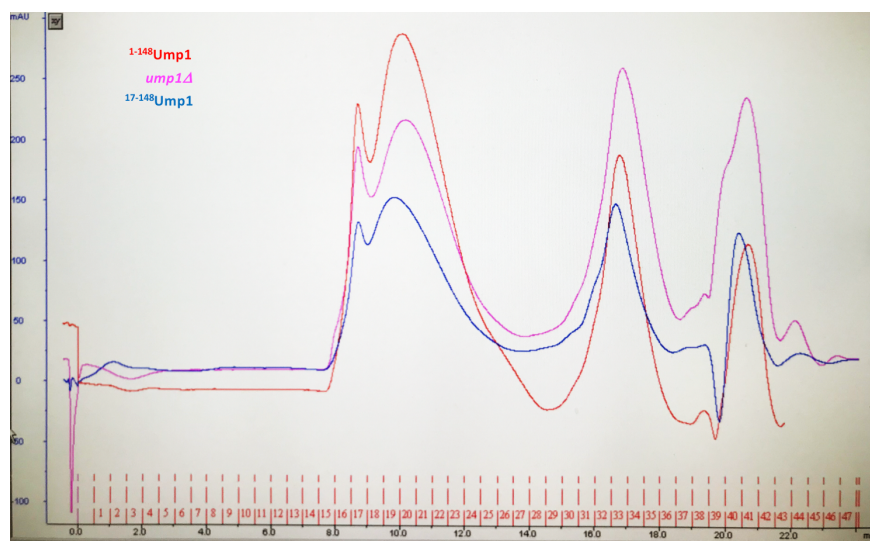

## Supplementary Tables

Table S1 – *S. cerevisiae* strains used in this study

| Strain*  | Relevant Genotype                                          | Source/Derivative               |
|----------|------------------------------------------------------------|---------------------------------|
| JD47-13C | <i>MATa his3-Δ200 leu2-3,112 lys2-801 trp1-Δ63 ura3-52</i> | Dohmen <i>et al.</i> 1995 [21]  |
| AM106-2C | <i>MATa blm10Δ::kanMX6 ump1-Δ::HIS3</i>                    | Marques <i>et al.</i> 2007 [26] |
| AM106-1A | <i>MATa blm10Δ::kanMX6</i>                                 | Marques <i>et al.</i> 2007 [26] |
| AM144    | <i>MATa pre4-ΔCTE ump1-Δ::HIS3</i>                         | Marques <i>et al.</i> 2007 [26] |
| JD59     | <i>MATa ump1Δ::HIS3</i>                                    | Ramos <i>et al.</i> 1998 [5]    |
| ML4      | <i>MATa rpn4Δ::HIS3-MX6</i>                                | London <i>et al.</i> 2004 [20]  |
| JD134    | <i>MATa ump1Δ::HIS3 PRE2-ha::Ylplac211</i>                 | Ramos <i>et al.</i> 1998 [5]    |
| JD135    | <i>MATa UMP1-2HA::Ylplac128 PRE3-2HA::Ylplac211</i>        | Ramos <i>et al.</i> 1998. [5]   |
| JD136    | <i>MATa ump1Δ::HIS3 PRE3-2HA::Ylplac211</i>                | Ramos <i>et al.</i> 1998. [5]   |
| JD138    | <i>MATa PRE2-2HA::Ylplac211</i>                            | Ramos <i>et al.</i> 1998. [5]   |
| PR307    | <i>MATa ump1Δ::HIS3 PRE4-2HA::Ylplac211</i>                | This work                       |
| PR327    | <i>MATa PRE4-HA::Ylplac211</i>                             | This work                       |

\*All strains are congenic derivatives of JD47-13C, which served as a “wild type”.

Table S2 – *S. cerevisiae* plasmids used in this study

| Name      | Relevant characteristics                                   | Source                           |
|-----------|------------------------------------------------------------|----------------------------------|
| pAM5      | <i>P<sub>CUP1</sub>-PRE4-T<sub>CYC1</sub>::YEplac181</i>   | Marques <i>et al.</i> 2007 [26]  |
| pAM8      | <i>P<sub>CUP1</sub>-PRE2-T<sub>CYC1</sub>::YEplac181</i>   | Marques <i>et al.</i> 2007 [26]  |
| pAR1      | <i>P<sub>UMP1</sub><sup>17-148</sup>ump1-HA::YCplac22</i>  | A. Riesener 2002                 |
| pAR3      | <i>P<sub>UMP1</sub><sup>56-148</sup>ump1-HA::YCplac22</i>  | A. Riesener 2002                 |
| pAR9      | <i>P<sub>UMP1</sub><sup>82-148</sup>ump1-HA::YCplac22</i>  | A. Riesener 2002                 |
| pAR12     | <i>P<sub>GAL1</sub>-UMP1-HA::YEplac181</i>                 | A. Riesener 2002                 |
| pAR4      | <i>P<sub>GAL1</sub><sup>17-148</sup>ump1-HA::YEplac181</i> | A. Riesener 2002                 |
| pCR42     | <i>P<sub>UMP1</sub>-ump1-I3T,S11P-HA::YCplac22</i>         | This work                        |
| pCR59     | <i>P<sub>CUP1</sub>-PRE4-T<sub>CYC1</sub>::pRS327</i>      | This work                        |
| pJDNERF22 | <i>P<sub>UMP1</sub>-UMP1-HA::YCplac22</i>                  | This work                        |
| pJH57-19  | <i>P<sub>UMP1</sub>-ump1-L29S-HA::YCplac22</i>             | J. Höckendorff 2000              |
| pHT9      | <i>P<sub>CUP1</sub>-SCL1::YEplac181</i>                    | H. Thran 2004                    |
| Rpn4*     | <i>rpn4<sub>Δ1-10/Δ211-229</sub>::pRS314</i>               | Wang <i>et al.</i> 2010 [25]     |
| YCplac22  | <i>ARS1-CEN4-TRP1</i>                                      | Gietz <i>et al.</i> 1988 [38]    |
| YEplac181 | <i>2μ-LEU2</i>                                             | Gietz <i>et al.</i> 1988 [38]    |
| pRS314    | <i>ARSH4-CEN6-TRP1</i>                                     | Sikorski <i>et al.</i> 1989 [39] |
| pRS327    | <i>2μ-LYS2</i>                                             | Eriksson <i>et al.</i> 2004 [40] |

**Table S3 – *E. coli* plasmids used in this study**

| Name        | Relevant characteristics                                         | Source                    |
|-------------|------------------------------------------------------------------|---------------------------|
| pET11a (EV) | P <sub>Trc</sub> ; Amp <sup>R</sup>                              | Novagen                   |
| pJZ14       | 8His-SUMO1-PRE3                                                  | This study                |
| pJZ17       | 8His-SUMO1-PRE4                                                  | This study                |
| pJZ18       | 8His-SUMO1-ΔLS-pre4 (residues 34-266)                            | This study                |
| pJZ19       | 8His-SUMO1-pre4Δ-CTE (residues 1-247)                            | This study                |
| pJZ27       | mNG-2HA                                                          | This study                |
| pJZ29       | PRE4-mNG-2HA (β7 precursor form)                                 | This study                |
| pJZ30       | <sup>1-33</sup> pre4 (β7 pro-peptide, residues 1-33)-mNG-2HA     | This study                |
| pJZ33       | <sup>34-266</sup> pre4 (β7 mature form, residues 34-266)-mNG-2HA | This study                |
| pJZ34       | <sup>17-148</sup> ump1-6His                                      | This study                |
| pJD492      | UMP1-6His                                                        | Sá-Moura et al. 2013 [15] |
| pCR32       | <sup>1-81</sup> ump1-6His                                        | This study                |
| pCR33       | <sup>82-148</sup> ump1-6His                                      | This study                |
| pCR61       | <sup>17-81</sup> ump1-6His                                       | This study                |
| pCR62       | <sup>1-81, 13T</sup> ump-6His                                    | This study                |
| pCR64       | <sup>1-81, S11P</sup> ump1-6His                                  | This study                |
| pMAL-c2X    | MBP                                                              | New England Biolabs       |
| pMO6        | MBP-pre4-CTE (β7 C-terminal extension, residues 248-266)         | M.O. Nunes 2015           |

**Table S4 – Relevant antibodies used in this study**

| Antibody                                    | Host   | Dilution | Source                |
|---------------------------------------------|--------|----------|-----------------------|
| Anti-HA (3F10)-Peroxidase                   | rat    | 1:2000   | Roche                 |
| Anti-β7 serum, primary                      | rabbit | 1:1000   | This study            |
| Anti-β1 serum, primary                      | rabbit | 1:1000   | This study            |
| Anti-Ump1, primary                          | rabbit | 1:500    | Ramos et al. 1998 [5] |
| Anti-6His, primary                          | mouse  | 1:2000   | Invitrogen            |
| Anti-MBP, primary                           | mouse  | 1:10000  | New England Biolabs   |
| Anti-rabbit Alexa Fluor Plus 800, secondary | goat   | 1:5000   | Thermo-Fisher         |
| anti-mouse Alexa Fluor Plus 680, secondary  | goat   | 1:5000   | Thermo Fisher         |
| Anti-Rabbit, HRP                            | donkey | 1:5000   | GE Healthcare         |
| Anti-Mouse, HRP                             | goat   | 1:5000   | Sigma-Aldrich         |

## **Supplementary method**

### ***Binding assay on amylose resin***

50 µl Amylose resin (New England BioLabs) per sample were equilibrated 2x with 1 ml Buffer A (50 mM Tris-HCl pH 7.4, 150 mM NaCl, 10 % Glycerol, 1 mM DTT). Native protein extracts of 50 OD cells (750 µl) expressing MBP-β7-CT or MBP control were incubated with the beads for 90 min at 4 °C, rotating. Afterwards, washing was performed 2x with 1 ml Buffer A and 3x with 1 ml Buffer B (Buffer A + 1 mg/ml BSA). Binding was proceeded with native protein extracts of 50 OD cells expressing different Ump1 variants (1-148Ump1 and 16-148Ump1) for 90 min at 4 °C, rotating. In the end, samples were washed 1x with 0.5 ml Buffer B and 2x with 0.5 ml Buffer A and eluted in 40 µl 1x Sample Buffer (5x Sample Buffer: 312,5 mM Tris pH 6.8, 10 % SDS, 50 % glycerol, 0.01 % bromophenol blue, 5 % β-mercaptoethanol) at 99 °C for 5 min. Samples were analyzed by 12 % SDS-PAGE and immunoblot using anti-MBP and anti-Ump1 antibodies.
